# Supplementary material for: Variable and interactive effects of Sex, APOE ε4 and TREM2 on the deposition of tau in entorhinal and neocortical regions.
Source: Research Square preprint supplement (doi:10.21203/rs.3.rs-4804430/v1), 2024-08-09
Supplement: Supplementary file 1 [file 0d507dafa0c60ebcf6d2c4fd.docx]

**Supplementary Material:**

**Variable and interactive effects of Sex, APOE ε4 and TREM2 on the deposition of tau in entorhinal and neocortical regions.**

Joseph Giorgio, Caroline Jonson, Yilin Wang, Jennifer S. Yokoyama, Jingshen Wang, William Jagust, for the Alzheimer’s Disease Neuroimaging Initiative, The Health and Aging Brain Study (HABS-HD) Study Team+.

**Supplementary Tables & Figures:**

**Supplementary Table 1 Aβ as outcome, estimates in the discovery sample.**

|  | Estimate | P-value |
| --- | --- | --- |
| (Intercept) | -41.1119 | 0.0217 |
| Age | 0.9650 | <0.001 |
| SEXfemale | -1.2392 | 0.6860 |
| *TREM2*1 | 0.0734 | 0.9905 |
| *APOE*-ε41 | 27.7510 | <0.001 |
| *APOE*-ε42 | 41.9344 | <0.001 |

Supplementary Table 1: Estimations and p-values of the coefficients in *Aβ* response model

**Supplementary Table 2 Aβ as outcome, estimates in the replication sample.**

|  | Estimate | P-value |
| --- | --- | --- |
| (Intercept) | -69.9764 | <0.001 |
| Age | 1.1713 | <0.001 |
| SEXfemale | 5.7282 | 0.0034 |
| *APOE*-ε41 | 11.9712 | <0.001 |
| *APOE*-ε42 | 24.5695 | <0.001 |

Supplementary Table 2: Estimations and p-values of the coefficients in *Aβ* response model

**Supplementary Table 3 Aβ as outcome, estimates in the replication sample including race as confound.**

|  | Estimate | P-value |
| --- | --- | --- |
| (Intercept) | -68.3143 | <0.001 |
| Age | 1.1079 | <0.001 |
| SEXfemale | 6.9685 | 0.0392 |
| *APOE*-ε41 | 5.2655 | 0.1418 |
| *APOE*-ε42 | 8.5325 | 0.2957 |
| Race(Hispanic) | 5.8796 | 0.1610 |
| Race(White) | 1.9250 | 0.6173 |
| SEXfemale: Race(Hispanic) | -4.3317 | 0.3814 |
| SEXfemale: Race(White) | -0.0493 | 0.9913 |
| *APOE*-ε41:Race(Hispanic) | 6.3469 | 0.2928 |
| *APOE*-ε42: Race(Hispanic) | 48.2133 | 0.0013 |
| *APOE*-ε41: Race(White) | 13.9903 | 0.0046 |
| *APOE*-ε42: Race(White) | 21.9428 | 0.0815 |

Supplementary Table 3: Estimations and p-values of the coefficients in *Aβ* response model

**Supplementary Table 4 EC tau as outcome, estimates in the discovery sample.**

|  | Estimate | P-value |
| --- | --- | --- |
| (Intercept) | 0.8679 | <0.001 |
| *Aβ* | 0.0013 | <0.001 |
| Age | 0.0030 | 0.0072 |
| SEXfemale | -0.0071 | 0.7346 |
| *TREM2*1 | -0.0795 | 0.1017 |
| *APOE*-ε41 | 0.0283 | 0.2479 |
| *APOE*-ε42 | -0.0380 | 0.5082 |
| *Aβ* × *APOE*-ε41 | 0.0001 | 0.7667 |
| *Aβ* × *APOE*-ε42 | 0.0022 | 0.0018 |
| *Aβ* × SEXfemale | 0.0008 | 0.0319 |
| SEXfemale × *TREM2*1 | 0.1239 | 0.0407 |

Supplementary Table 4: Estimations and p-values of the coefficients in EC tau response model

**Supplementary Table 5 EC tau as outcome, estimates in the replication sample.**

|  | Estimate | P-value |
| --- | --- | --- |
| (Intercept) | 1.2796 | <0.001 |
| *Aβ* | 0.0021 | 0.0002 |
| Age | 0.0001 | 0.9204 |
| SEXfemale | -0.0266 | 0.1445 |
| *APOE*-ε41 | 0.0209 | 0.3356 |
| *APOE*-ε42 | -0.0591 | 0.3756 |
| *Aβ* × *APOE*-ε41 | 0.0007 | 0.2773 |
| *Aβ* × *APOE*-ε42 | 0.0036 | 0.0196 |
| *Aβ* × SEXfemale | 0.0013 | 0.0285 |

Supplementary Table 5: Estimations and p-values of the coefficients in EC tau response model

**Supplementary Table 6 EC tau as outcome, estimates in the replication sample including race as confound.**

|  | Estimate | P-value |
| --- | --- | --- |
| Intercept) | 1.2689 | <0.001 |
| *Aβ* | 0.0020 | <0.001 |
| Age | -0.0000 | 0.9834 |
| SEXfemale | -0.0398 | 0.1730 |
| *APOE*-ε41 | 0.0287 | 0.3582 |
| *APOE*-ε42 | -0.0397 | 0.5894 |
| Race(Hispanic) | 0.0488 | 0.1779 |
| Race(White) | 0.0129 | 0.6981 |
| *Aβ* × *APOE*-ε41 | 0.0005 | 0.3590 |
| *Aβ* × *APOE*-ε42 | 0.0024 | 0.2169 |
| *Aβ* × SEXfemale | 0.0013 | 0.0332 |
| SEXfemale: Race(Hispanic) | -0.0031 | 0.9408 |
| SEXfemale: Race(White) | 0.0349 | 0.3798 |
| *APOE*-ε41:Race(Hispanic) | -0.0221 | 0.6710 |
| *APOE*-ε42: Race(Hispanic) | 0.1509 | 0.3453 |
| *APOE*-ε41: Race(White) | 0.0106 | 0.8077 |
| *APOE*-ε42: Race(White) | -0.0079 | 0.9483 |

Supplementary Table 6: Estimations and p-values of the coefficients in EC tau response model

**Supplementary Table 7 MetaTemp tau as outcome, estimates in the discovery sample.**

|  | Estimate | P-value |
| --- | --- | --- |
| (Intercept) | 0.4039 | <0.001 |
| *Aβ* | 0.0002 | 0.1787 |
| EC tau | 0.6809 | <0.001 |
| Age | -0.0000 | 0.9261 |
| Sexfemale | 0.0613 | 0.1407 |
| *TREM2*1 | -0.3580 | 0.0001 |
| *APOE*-ε41 | -0.0406 | 0.3762 |
| *APOE*-ε42 | -0.4640 | <0.001 |
| *Aβ*≥60 × *τ*EC | 0.0194 | 0.0491 |
| EC tau × *APOE*-ε41 | 0.0186 | 0.6287 |
| EC tau × *APOE*-ε42 | 0.3643 | <0.001 |
| EC tau × *TREM2*1 | 0.3093 | 0.0001 |
| *TREM2*1 × *APOE*-ε41 | 0.0821 | 0.0168 |
| *TREM2*1 × APOE42 | -0.0047 | 0.9362 |
| *Aβ* × *TREM2*1 | -0.0006 | 0.1364 |
| EC tau × SEXfemale | -0.0504 | 0.1496 |

Supplementary Table 7: Estimations and p-values of the coefficients in MetaTemp tau response model

**Supplementary Table 8 MetaTemp tau as outcome, estimates in the replication sample.**

|  | Estimate | P-value |
| --- | --- | --- |
| (Intercept) | 0.5528 | <0.001 |
| *Aβ* | -0.0001 | 0.7438 |
| EC tau | 0.4449 | <0.001 |
| Age | -0.0006 | 0.1572 |
| Sexfemale | -0.0099 | 0.8073 |
| *APOE*-ε41 | 0.0793 | 0.0630 |
| *APOE*-ε42 | -0.2137 | 0.0078 |
| *Aβ*≥60×EC tau | 0.1018 | <0.001 |
| EC tau × *APOE*-ε41 | -0.0647 | 0.0383 |
| EC tau × *APOE*-ε42 | 0.1540 | 0.0057 |
| EC tau × SEXfemale | 0.0272 | 0.3688 |

Supplementary Table 8: Estimations and p-values of the coefficients in MetaTemp tau response model

**Supplementary Table 9 MetaTemp as outcome, estimates in the replication sample including race as confound.**

|  | Estimate | P-value |
| --- | --- | --- |
| (Intercept) | 0.5428 | <0.001 |
| *Aβ* | -0.0001 | 0.6896 |
| EC tau | 0.4420 | <0.001 |
| Age | -0.0005 | 0.3152 |
| Sexfemale | -0.0098 | 0.8109 |
| *APOE*-ε41 | 0.0811 | 0.0583 |
| *APOE*-ε42 | -0.1693 | 0.04 |
| *Aβ*≥60×EC tau | 0.1013 | <0.001 |
| Race(Hispanic) | 0.0114 | 0.441 |
| Race(White) | 0.0004 | 0.9788 |
| EC tau × *APOE*-ε41 | -0.0665 | 0.0357 |
| EC tau × *APOE*-ε42 | 0.1260 | 0.0369 |
| EC tau × SEXfemale | 0.0328 | 0.282 |
| SexF:raceHispanic | -0.0131 | 0.4526 |
| SexF:raceWhite | -0.0098 | 0.5432 |
| SEXfemale: Race(Hispanic) | -0.0165 | 0.4388 |
| SEXfemale: Race(White) | 0.0813 | 0.1630 |
| *APOE*-ε41:Race(Hispanic) | 0.0107 | 0.5457 |
| *APOE*-ε42: Race(Hispanic) | -0.0571 | 0.2074 |

Supplementary Table 9: Estimations and p-values of the coefficients in MetaTemp tau response model

**Supplementary Table 10 Mediation effects of *APOE*-ε4, TREM2 and SEX in the discovery sample.**

| Part A. Weighted average mediation effects (WAME) for *APOE*-ε4 groups | | | | | | |
| --- | --- | --- | --- | --- | --- | --- |
| *APOE*-ε4 | Group Size | Group Prop   (100%) | WAME  Size | p-value | 2*.*5%  quantile | 97*.*5% quantile |
| 0 | 353 | 56.3898 | 0.0012 | <0.001 | 0.0008 | 0.0016 |
| 1 | 239 | 38.1789 | 0.0013 | <0.001 | 0.0008 | 0.0018 |
| 2 | 34 | 5.4313 | 0.0042 | 0.0010 | 0.0016 | 0.0070 |
| 1-0 |  |  | 0.0002 | 0.6620 | -0.0005 | 0.0008 |
| 2-0 |  |  | 0.0031 | 0.0220 | 0.0003 | 0.0059 |
| 2-1 |  |  | 0.0029 | 0.0330 | 0.0002 | 0.0057 |

Part B. Weighted average mediation effects (WAME) for *TREM2* groups

| *TREM2* | Group Size | Group Prop  (100%) | WAME  Size | p-value | 2*.*5%  quantile | 97*.*5% quantile |
| --- | --- | --- | --- | --- | --- | --- |
| 0 | 586 | 93.6102 | 0.0013 | <0.001 | 0.0010 | 0.0016 |
| 1 | 40 | 6.3898 | 0.0021 | <0.001 | 0.0014 | 0.0028 |
| 1-0 |  |  | 0.0008 | 0.0140 | 0.0001 | 0.0013 |

Part C. Weighted average mediation effects (WAME) for SEX groups

| SEX | Group Size | Group Prop  (100%) | WAME  Size | p-value | 2*.*5%   quantile | 97*.*5%  quantile |
| --- | --- | --- | --- | --- | --- | --- |
| Male (0) | 290 | 46.3259 | 0.0011 | <0.001 | 0.0007 | 0.0016 |
| Female (1) | 336 | 53.6741 | 0.0016 | <0.001 | 0.0012 | 0.0020 |
| 1-0 |  |  | 0.0005 | 0.1100 | -0.0002 | 0.0011 |

Supplementary Table 10. Weighted Average Mediation Effect (WAME) and corresponding p-values for the *Aβ* → TauEC → TauMeta pathway across different levels of *APOE*-ε4 (Part A of the table), *TREM2* (Part B of the table), and SEX (Part C of the table). Pairwise differences are denoted as 1-0, 2-0, and 2-1, for instance, *APOE*-ε4 = `1-0` in Part A represents the mediation effect for the *APOE*-ε4 = 1 group minus that for the *APOE*-ε4 = 0 group.

**Supplementary Table 11 Mediation effects of APOE4 and SEX in the replication sample.**

| Part A. Weighted average mediation effects (WAME) for *APOE*-ε4 groups | | | | | | |
| --- | --- | --- | --- | --- | --- | --- |
| *APOE*-ε4 | Group Size | Group Prop   (100%) | WAME  Size | one-sided  p-value | 5%  quantile | 100% quantile |
| 0 | 514 | 71.9888 | 0.0013 | 0.002 | 0.0008 | 0.0030 |
| 1 | 179 | 25.0700 | 0.0015 | 0.000 | 0.0011 | 0.0024 |
| 2 | 21 | 2.9412 | 0.0040 | 0.066 | 0.0011 | 0.0120 |
| 1-0 |  |  | 0.0001 | 0.410 | -0.0006 | 0.0016 |
| 2-0 |  |  | 0.0026 | 0.141 | -0.0004 | 0.0100 |
| 2-1 |  |  | 0.0025 | 0.156 | -0.0005 | 0.0104 |

Part B. Weighted average mediation effects (WAME) for SEX groups

| SEX | Group Size | Group Prop  (100%) | WAME  Size | one-sided  p-value | 5%   quantile | 100%  quantile |
| --- | --- | --- | --- | --- | --- | --- |
| Male (0) | 290 | 40.6162 | 0.0011 | 0.000 | 0.0006 | 0.0020 |
| Female (1) | 424 | 59.3838 | 0.0017 | 0.000 | 0.0011 | 0.0033 |
| 1-0 |  |  | 0.0006 | 0.086 | 0.0000 | 0.0021 |

Supplementary Table 11. Weighted Average Mediation Effect (WAME) and corresponding p-values for the *Aβ* → TauEC → TauMeta pathway across different levels of *APOE*-ε4 (Part A of the table) and SEX (Part B of the table). Pairwise differences are denoted as 1-0, 2-0, and 2-1, for instance, *APOE*-ε4 = `1-0` in Part A represents the mediation effect for the *APOE*-ε4 = 1 group minus that for the *APOE*-ε4 = 0 group.

**Supplementary Methods**

**Model Building**

To understand the heterogeneous influence of *APOE*-ε4, Sex, and *TREM2* on the downstream AD cascade, we adopted structural equation models with interaction terms to estimate a variety of causal effects. While interaction terms here are helpful to capture the heterogeneity between subpopulations with different genetic profiles, given potentially limited statistical powers to model all possible interaction terms among variables presented in Figure 1, we adopted forward selection with the Akaike Information Criterion (AIC) to choose interaction terms for the SEMs. This method involves evaluating all potential up-to-two-way interactions, ensuring that only those with substantial statistical contributions are included. In particular, because the interaction term between two continuous variables is difficult to interpret, we split Aβ into four groups (< 10, 10–40, 40–60, > 60) based on prior knowledge from the literature when selecting interaction terms between Aβ and other continuous variables. This model selection procedure resulted in the following structural equation models:

Aβ = *µ₀* + *α*0Age + *β*0Sex + *γ*0*TREM2* + *δ*01 *APOE*-ε4₁ + *δ*02 *APOE*-ε4₂ + *ϵ*0,

TauEC = (*θ*1 + *λ*11 *APOE*-ε41 + *λ*12 *APOE*-ε42 + *ζ*1Sex) × *Aβ*+ *µ*1 + *α*1Age + *β*1Sex + *γ*1*TREM2*

+ *δ*11 *APOE*-ε41 + *δ*12 *APOE*-ε42 + *ϕ*1Sex × *TREM2* + *ϵ*1*,*

TauMeta = (*κ*2 + *ν*21{*Aβ*≥60} + *τ*2*TREM2* + *π*21 *APOE*-ε41 + *π*22 *APOE*-ε42 + *η*2Sex) × TauEC+ *µ*2 + *θ*2*Aβ*

+ *α*2Age + *β*2Sex + *γ*2*TREM2* + *δ*21 *APOE*-ε41 + *δ*22 *APOE*-ε42

+ *ω*21*TREM2* × *APOE*-ε41+*ω*22*TREM2* × *APOE*-ε42 + *ψ*2*Aβ* × *TREM2* + *ϵ*2*.*

**Mediation Effect Analysis**

These structural equation models facilitates the quantification of the mediation effect of the Aβ →TauEC → TauMeta  pathway, which can be expressed as:

*µ*(*Aβ* ∣ *TREM2, APOE*-ε4*,* Sex*,* 1{*Aβ*≥60})

= E(TauMeta ∣ *TREM2, APOE*-ε4*,* Sex*,* 1{*Aβ*≥60}*, Aβ* = *c,* TauEC(*Aβ* = *a* + 1))

− E(TauMeta ∣ *TREM2, APOE*-ε4*,* Sex*,* 1{*Aβ*≥60}*, Aβ* = *c,* TauEC(*Aβ* = *a*))

= (*κ*2 + *ν*21{*Aβ*≥60} + *τ*2*TREM2* + *π*21 *APOE*-ε41 + *π*22 *APOE*-ε42 + *η*2Sex)

× (*θ*1 + *λ*11 *APOE*-ε41 + *λ*12 *APOE*-ε42 + *ζ*1Sex)

**Supplementary Table 12** displays the effect sizes and corresponding p-values for the mediation effect within various subgroups defined by levels of Sex (male/female), *TREM2* (0/1), *APOE*-ε4 (0/1/2), and

1{*Aβ*≥60}, all of which are mutually exclusive with sample sizes and proportions provided.

To elucidate the mediation effect with respect to individual factors, we calculated the weighted

mean of the mediation effect for varying levels of *APOE*-ε4, *TREM2*, and Sex, as presented in **Supplementary Table 13**. Additionally, pairwise differences within each factor are reported.

**Supplementary Table 12 Mediation Effects for all different groups in the discovery sample.**

| Sex | *TREM2* | *APOE*-ε4 | 1{*Aβ*≥60} | Group Size | Group Prop   (100%) | Effect Size | p-value |
| --- | --- | --- | --- | --- | --- | --- | --- |
| 0 | 0 | 0 | 0 | 130 | 20.7668 | 0.0009 | 0.0020 |
| 1 | 0 | 0 | 0 | 141 | 22.5240 | 0.0013 | <0.001 |
| 0 | 1 | 0 | 0 | 6 | 0.9585 | 0.0013 | 0.0040 |
| 1 | 1 | 0 | 0 | 10 | 1.5974 | 0.0020 | <0.001 |
| 0 | 0 | 1 | 0 | 51 | 8.1470 | 0.0010 | 0.0040 |
| 1 | 0 | 1 | 0 | 69 | 11.0224 | 0.0014 | <0.001 |
| 0 | 1 | 1 | 0 | 3 | 0.4792 | 0.0015 | 0.0020 |
| 1 | 1 | 1 | 0 | 4 | 0.6390 | 0.0021 | <0.001 |
| 0 | 0 | 2 | 0 | 7 | 1.1182 | 0.0037 | 0.0030 |
| 1 | 0 | 2 | 0 | 11 | 1.7572 | 0.0043 | <0.001 |
| 0 | 1 | 2 | 0 | 0 | 0.0000 | 0.0048 | 0.0040 |
| 1 | 1 | 2 | 0 | 2 | 0.3195 | 0.0056 | <0.001 |
| 0 | 0 | 0 | 1 | 33 | 5.2716 | 0.0009 | 0.0030 |
| 1 | 0 | 0 | 1 | 31 | 4.9521 | 0.0014 | <0.001 |
| 0 | 1 | 0 | 1 | 0 | 0.0000 | 0.0013 | 0.0040 |
| 1 | 1 | 0 | 1 | 2 | 0.3195 | 0.0020 | <0.001 |
| 0 | 0 | 1 | 1 | 49 | 7.8275 | 0.0010 | 0.0030 |
| 1 | 0 | 1 | 1 | 51 | 8.1470 | 0.0015 | <0.001 |
| 0 | 1 | 1 | 1 | 5 | 0.7987 | 0.0015 | 0.0020 |
| 1 | 1 | 1 | 1 | 7 | 1.1182 | 0.0022 | <0.001 |
| 0 | 0 | 2 | 1 | 6 | 0.9585 | 0.0038 | 0.0030 |
| 1 | 0 | 2 | 1 | 7 | 1.1182 | 0.0044 | <0.001 |
| 0 | 1 | 2 | 1 | 0 | 0.0000 | 0.0049 | 0.0030 |
| 1 | 1 | 2 | 1 | 1 | 0.1597 | 0.0057 | <0.001 |

Supplementary Table 12: Mediation effect sizes and p-values for the *Aβ* → TauEC → TauMeta causal pathway across levels of Sex (0 for male, 1 for female), *TREM2*, *APOE*-ε4, and 1{*Aβ*≥60}. Each row represents a unique subgroup, with the corresponding group size and proportion detailed. P-values are calculated using 1000 times the multiplier bootstrap

**Supplementary Table 13 Mediation Effects for all different groups in the replication sample.**

| Sex | *APOE*-ε4 | 1{*Aβ*≥60} | Group Size | Group Prop   (100%) | Effect Size | one-sided  p-value |
| --- | --- | --- | --- | --- | --- | --- |
| 0 | 0 | 0 | 192 | 26.8908 | 0.0009 | 0.002 |
| 1 | 0 | 0 | 286 | 40.0560 | 0.0016 | 0.002 |
| 0 | 1 | 0 | 64 | 8.9636 | 0.0010 | 0.001 |
| 1 | 1 | 0 | 93 | 13.0252 | 0.0017 | 0.000 |
| 0 | 2 | 0 | 9 | 1.2605 | 0.0034 | 0.091 |
| 1 | 2 | 0 | 8 | 1.1204 | 0.0044 | 0.049 |
| 0 | 0 | 1 | 16 | 2.2409 | 0.0011 | 0.003 |
| 1 | 0 | 1 | 20 | 2.8011 | 0.0019 | 0.001 |
| 0 | 1 | 1 | 6 | 0.8403 | 0.0013 | 0.001 |
| 1 | 1 | 1 | 16 | 2.2409 | 0.0021 | 0.000 |
| 0 | 2 | 1 | 3 | 0.4202 | 0.0040 | 0.083 |
| 1 | 2 | 1 | 1 | 0.1401 | 0.0051 | 0.039 |

Supplementary Table 13: Mediation effect sizes and p-values for the *Aβ* → TauEC → TauMeta causal pathway across levels of Sex (0 for male, 1 for female), *APOE*-ε4, and 1{*Aβ*≥60}. Each row represents a unique subgroup, with the corresponding group size and proportion detailed. P-values are calculated using 1000 times the multiplier bootstrap.
