# Supplementary material for: Variable and interactive effects of Sex, APOE ε4 and TREM2 on the deposition of tau in entorhinal and neocortical regions.
Source: Research Square preprint supplement (doi:10.21203/rs.3.rs-4804430/v1), 2024-08-09
Supplement: Supplementary file 2 [file 6f168a66258005c3dfeee194.docx]

**Tables**

| **Sample** | **Discovery** | | | **Replication** |
| --- | --- | --- | --- | --- |
| **Cohort** | **ADNI** | **A4** | **Combined** | **HABS-HD** |
| **n** | 297 | 331 | 628 | 726 |
| **Sex n(F%)** | 139(47%) | 199(60%) | 338(54%) | 433(60%) |
| **Age mean±std** | 77.9±7.2 | 71.7±4.8 | 74.6±6.8 | 65±8.1 |
| **Diagnosis (CN/MCI/AD)** | 162/99/33* | 331/0/0 | 493/99/33* | 551/130/45 |
| **Race (White/Hispanic/Black/Other)** | 254/13/11/8+ | 314/0/8/5++ | 568/13/19/13+++ | 273/216/237/0 |
| **Aβ CL mean±std** | 33.4±43.2 | 51.9±35.4 | 43.1±40.3 | 13.4±27.6 |
| **EC Tau SUVR mean±std^** | 1.19±0.26 | 1.18±0.16 | 1.18±0.21 | 1.32±0.23 |
| **MetaTemp Tau SUVR mean±std^** | 1.23±0.28 | 1.21±0.11 | 1.22±0.21 | 1.13±0.16 |
| ***APOE*-ε4 n alleles(1%,2%)** | 83(28)/16(5) | 157(47)/18(5) | 240(38)/34(5) | 182(25)/21(3) |
| ***TREM2* Gene Burden n(%)** | 17(5.7) | 23(6.9) | 40(6.4) | Not Available |
| **rs2234256 n** | 7 | 4 | 11 | Not Sampled |
| **rs2234255 n** | 0 | 1 | 1 | Not Sampled |
| **rs142232675 n** | 4 | 0 | 4 | 2 |
| **rs143332484 n** | 7 | 13 | 20 | 13 |
| **rs75932628 n** | Not Sampled | 5 | 5 | Not Sampled |
| **rs2234253 n** | Not Sampled | 4 | 4 | Not Sampled |

**Table 1 Sample demographics.** The discovery sample was comprised of individuals from ADNI and A4 with multimodal PET imaging and whole genome sequencing. The replication sample was taken from the HABS-HD dataset. * 4 ADNI participants were missing diagnosis; +11 ADNI participants were missing race, ++4 A4 participants missing race, +++15 participants in the combined sample were missing race; ^The discovery Sample used FTP tau PET imaging, whereas the Replication sample used PI2620 tau PET imaging.
